# Supplementary material for: Targeting endothelial junctional adhesion molecule-A/ EPAC/ Rap-1 axis as a novel strategy to increase stem cell engraftment in dystrophic muscles
Source: PubMed Central journal article supplement (PMC3927958; doi:10.1002/emmm.201302520), 2013-12-30

Panel A

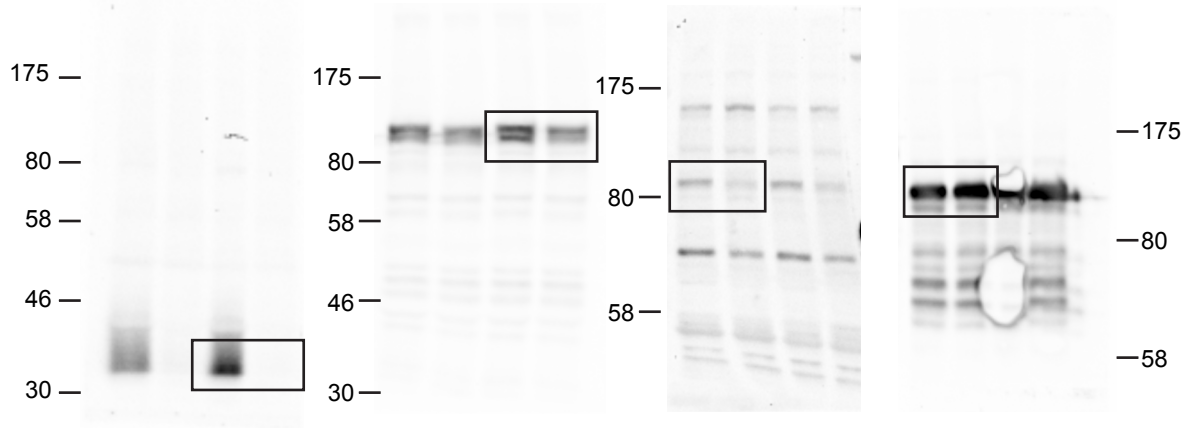

Panel B

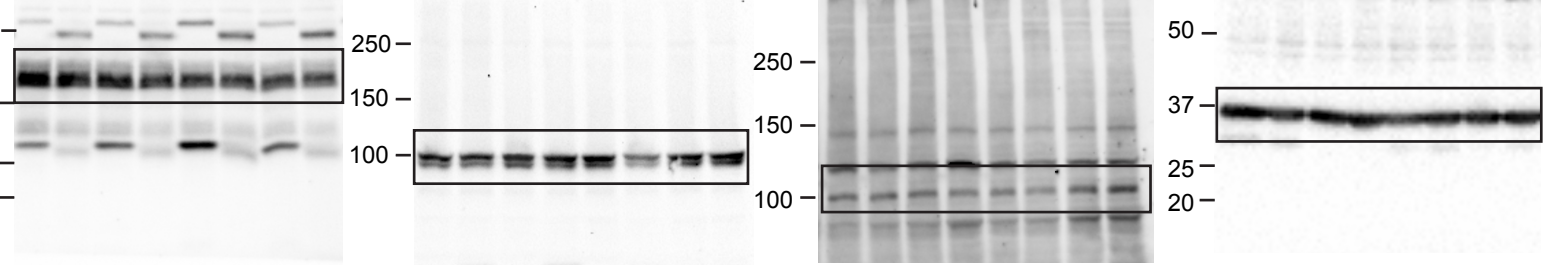

Panel C

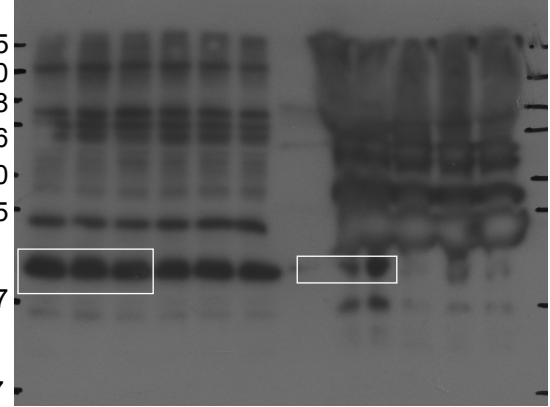

Panel D

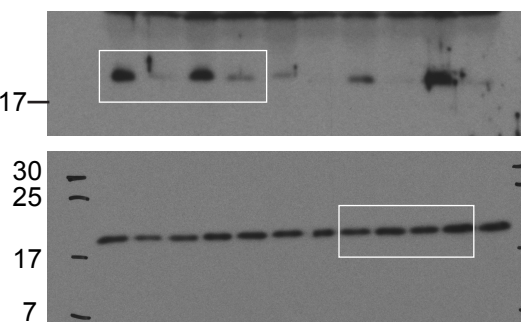

Panel G

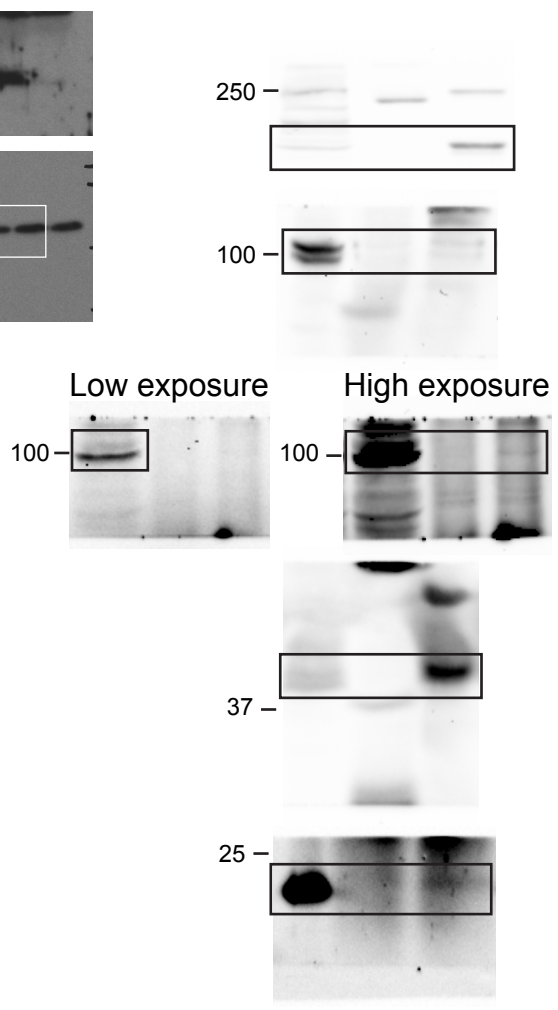

Panel H

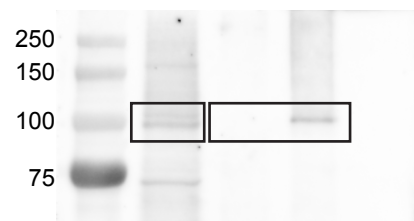

Low exposure

High exposure

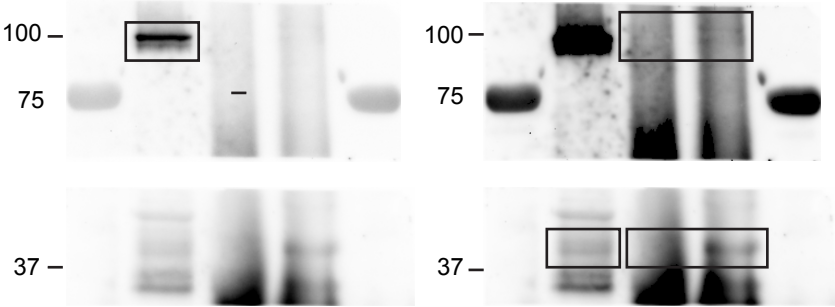

Supplement: emmm0006-0239-sd3.pdf [file emmm0006-0239-sd3.pdf]
